# Supplementary material for: Engineering integrative vectors based on phage site-specific recombination mechanism for Lactococcus lactis
Source: BMC Biotechnol. 2019 Nov 27;19:82. doi: 10.1186/s12896-019-0575-x (PMC6882331; doi:10.1186/s12896-019-0575-x)
Supplement: Supplementary file 1 — Additional file 1: Table S1. Data set of TBD assay of secreted nuclease. [file 12896_2019_575_MOESM1_ESM.xlsx]

## Sheet: Sheet1
	Constructs	R1	R2	R3	R4	Mean	S.D
	pS1nuc	0.2	0.2	0.2	0.2	0.2	0
	pS2nuc	0.6	0.4	0.6	0.4	0.5	0.11547
	pS3nuc	0.2	0.2	0.3	0.3	0.25	0.057735
	pS4nuc	0.6	0.5	0.5	0.7	0.575	0.0957427
	(-)control	0	0.1	0.1	0.1	0.075	0.05
