# Supplementary material for: Engineering integrative vectors based on phage site-specific recombination mechanism for Lactococcus lactis
Source: BMC Biotechnol. 2019 Nov 27;19:82. doi: 10.1186/s12896-019-0575-x (PMC6882331; doi:10.1186/s12896-019-0575-x)
Supplement: Supplementary file 2 — Additional file 2: Table S2. Data set of whole-cell ELISA of surface displayed nuclease. [file 12896_2019_575_MOESM2_ESM.xlsx]

## Sheet: Sheet1
	Repeat 1
		<>	0	2	4	6	8					Mean value
	pSD3nuc	A	0.32	1.1373	1.0096	1.1886	1.10925				<>	0	2	4	6	8
	pSD4nuc	B	0.31	1.1568	0.99735	1.2791	0.93285			pSD3nuc	A	0.388133	1.3294	1.05547	1.05693	1.10012
	pSD2nuc	C	0.301	0.9919	0.9728	0.98805	1.1469			pSD4nuc	B	0.440656	1.36843	1.15508	1.3778	1.11805
	pSD1nuc	D	0.0297	0.388	0.398	0.401	0.369			pSD2nuc	C	0.432333	1.30263	1.16987	1.28412	1.18133
	Control	E	0.0298	0.031	0.0301	0.0297	0.0298			pSD1nuc	D	0.0367333	0.386667	0.384	0.38	0.359133
										Control	E	0.0364	0.0356333	0.0347667	0.0343333	0.0341667
	Repeat 2
		<>	0	2	4	6	8
	pSD3nuc	A	0.319	1.3791	1.077	1.073	1.0709					Standard Deviation
	pSD4nuc	B	0.415967	1.3241	1.2083	1.6103	1.2795				<>	0	2	4	6	8
	pSD2nuc	C	0.3038	1.349	1.316	1.6653	1.2517			pSD3nuc	A	0.118877	0.1727	0.0397464	0.140391	0.0258879
	pSD1nuc	D	0.0412	0.393	0.383	0.374	0.372			pSD4nuc	B	0.14459	0.236931	0.138988	0.202114	0.174541
	Control	E	0.0406	0.0387	0.0378	0.0372	0.0369			pSD2nuc	C	0.225055	0.29034	0.177178	0.346555	0.0609439
										pSD1nuc	D	0.00616468	0.0070946	0.0135277	0.018735	0.0197447
	Repeat 3									Control	E	0.00578619	0.00408207	0.00410163	0.0040501	0.00382143
		<>	0	2	4	6	8
	pSD3nuc	A	0.5254	1.4718	1.0798	0.9092	1.1202
	pSD4nuc	B	0.596	1.6244	1.2596	1.244	1.1418
	pSD2nuc	C	0.6922	1.567	1.2208	1.199	1.1454
	pSD1nuc	D	0.0393	0.379	0.371	0.365	0.3364
	Control	E	0.0388	0.0372	0.0364	0.0361	0.0358
